# Supplementary material for: Individual Differences in Signal Perception for the Take-over Request in Autonomous Driving
Source: Preprints.org preprint supplement (doi:10.20944/preprints202306.2034.v1), 2023-06-28
Supplement: Supplementary file 1 [file supplementary]

## Sheet: gender
	열 레이블
	aud_lud_cog				aud_lud_com				aud_lud_prp				aud_pit_cog				aud_pit_com				aud_pit_prp				tac_cyc_cog				tac_cyc_com				tac_cyc_prp				tac_siz_cog				tac_siz_com				tac_siz_prp				vis_lum_cog
	A	B	C	D	A	B	C	D	A	B	C	D	A	B	C	D	A	B	C	D	A	B	C	D	A	B	C	D	A	B	C	D	A	B	C	D	A	B	C	D	A	B	C	D	A	B	C	D	A
man	0.371517	16.4087	39.257	43.9628	0.844476	18.0859	44.0535	37.0162	0	16.5902	42.2951	41.1148	3.24544	32.7924	30.6288	33.3333	7.02268	36.5033	34.1624	22.3116	4.32277	37.3919	31.268	27.0173	2.92683	21.1847	32.4739	43.4146	4.36893	23.4628	31.5534	40.6149	3.04348	20.7971	33.2609	42.8986	0	20.8977	33.039	46.0633	2.4	20.48	32.32	44.8	0	21.5385	32.8462	45.6154	0
woman	0.387347	16.6559	38.6701	44.2866	0.434153	17.5109	44.5007	37.5543	0.406229	16.4523	43.4665	39.675	2.61248	34.5428	29.971	32.8737	11.7137	37.8886	32.6826	17.7151	4.20233	37.4319	31.8288	26.537	3.86266	22.7468	32.4034	40.9871	9.33126	23.5614	32.1151	34.9922	4.93274	24.8879	33.9312	36.2481	0	19.7329	36.3501	43.9169	6.33631	21.6084	33.3063	38.749	0.453172	19.7885	35.1964	44.5619	0.391389
40s	0	14.1379	37.069	48.7931	1.16279	17.0543	41.0853	40.6977	0	14.0569	41.9929	43.9502	4.51128	30.8271	29.3233	35.3383	12.9666	38.1139	29.8625	19.057	5.88235	37.2549	28.2353	28.6275	6.80529	23.2514	31.0019	38.9414	14.1631	26.824	30.0429	28.97	7.89474	24.0602	31.391	36.6541	0	21.4425	36.0624	42.4951	8.99358	20.985	34.2612	35.7602	0	21.3439	35.9684	42.6877	0
50s	0	14.3556	41.925	43.7194	1.09489	16.0584	45.9854	36.8613	0	14.5299	44.9573	40.5128	4.31655	33.4532	33.9928	28.2374	4.5977	36.0153	38.8889	20.4981	5.59701	34.3284	33.7687	26.306	4.27807	18.1818	32.4421	45.098	5.91716	18.9349	31.1637	43.9842	4.34783	18.2971	31.8841	45.471	0	21.2569	34.7505	43.9926	1.17188	21.2891	31.6406	45.8984	0	22.1388	32.833	45.0281	0
60s	0	17.7546	38.5117	43.7337	0	18.3646	39.8123	41.8231	0	18.0593	38.6792	43.2615	2.51046	34.728	27.3361	35.4254	5.06329	34.5992	27.0042	33.3333	2.60116	34.6821	28.4682	34.2486	4.49775	27.2864	32.6837	35.5322	4.51807	27.259	32.6807	35.5422	4.58015	27.4809	32.6718	35.2672	0	22.8951	33.678	43.4269	0	24.3161	33.7386	41.9453	0	23.4399	33.9422	42.618	0
																																					20s
																																					30s
																																					40s
																																					50s
																																					60s
[truncated: 23 more columns]

## Sheet: age
	열 레이블
	aud_lud_cog				aud_lud_com				aud_lud_prp				aud_pit_cog				aud_pit_com				aud_pit_prp				tac_cyc_cog				tac_cyc_com				tac_cyc_prp				tac_siz_cog				tac_siz_com				tac_siz_prp				vis_lum_cog
	A	B	C	D	A	B	C	D	A	B	C	D	A	B	C	D	A	B	C	D	A	B	C	D	A	B	C	D	A	B	C	D	A	B	C	D	A	B	C	D	A	B	C	D	A	B	C	D	A
20s	0	16.9847	38.3588	44.6565	0	18.2033	50.1182	31.6785	0	17.7083	46.0417	36.25	1.36054	31.0658	36.7347	30.839	12.3007	37.1298	36.9021	13.6674	4.7619	39.9471	38.6243	16.6667	1.27389	16.9851	33.3333	48.4076	1.65289	14.3251	33.3333	50.6887	1.43885	17.2662	38.8489	42.446	0	16.7488	34.9754	48.2759	1.8018	17.1171	36.036	45.045	0	18.5379	33.6815	47.7807	0
30s	1.76211	18.7959	38.9134	40.5286	1.05263	19.1228	47.0175	32.807	0.947867	17.8515	44.2338	36.9668	1.96399	36.8249	26.6776	34.5336	13.7083	40.7733	36.9069	8.6116	3.2316	42.1903	31.4183	23.1598	0	22.314	32.7273	44.9587	8.04598	26.6284	31.9923	33.3333	1.06762	24.7331	34.5196	39.6797	0	17.8947	34.386	47.7193	10.5675	19.1781	29.3542	40.9002	1.10092	16.6972	33.7615	48.4404	0.909091
40s	0	14.1379	37.069	48.7931	1.16279	17.0543	41.0853	40.6977	0	14.0569	41.9929	43.9502	4.51128	30.8271	29.3233	35.3383	12.9666	38.1139	29.8625	19.057	5.88235	37.2549	28.2353	28.6275	6.80529	23.2514	31.0019	38.9414	14.1631	26.824	30.0429	28.97	7.89474	24.0602	31.391	36.6541	0	21.4425	36.0624	42.4951	8.99358	20.985	34.2612	35.7602	0	21.3439	35.9684	42.6877	0
50s	0	14.3556	41.925	43.7194	1.09489	16.0584	45.9854	36.8613	0	14.5299	44.9573	40.5128	4.31655	33.4532	33.9928	28.2374	4.5977	36.0153	38.8889	20.4981	5.59701	34.3284	33.7687	26.306	4.27807	18.1818	32.4421	45.098	5.91716	18.9349	31.1637	43.9842	4.34783	18.2971	31.8841	45.471	0	21.2569	34.7505	43.9926	1.17188	21.2891	31.6406	45.8984	0	22.1388	32.833	45.0281	0
60s	0	17.7546	38.5117	43.7337	0	18.3646	39.8123	41.8231	0	18.0593	38.6792	43.2615	2.51046	34.728	27.3361	35.4254	5.06329	34.5992	27.0042	33.3333	2.60116	34.6821	28.4682	34.2486	4.49775	27.2864	32.6837	35.5322	4.51807	27.259	32.6807	35.5422	4.58015	27.4809	32.6718	35.2672	0	22.8951	33.678	43.4269	0	24.3161	33.7386	41.9453	0	23.4399	33.9422	42.618	0
																																					20s
																																					30s
																																					40s
																																					50s
																																					60s
[truncated: 23 more columns]

## Sheet: experience
	열 레이블
	aud_lud_cog				aud_lud_com				aud_lud_prp				aud_pit_cog				aud_pit_com				aud_pit_prp				tac_cyc_cog				tac_cyc_com				tac_cyc_prp				tac_siz_cog				tac_siz_com				tac_siz_prp				vis_lum_cog
경력	A	B	C	D	A	B	C	D	A	B	C	D	A	B	C	D	A	B	C	D	A	B	C	D	A	B	C	D	A	B	C	D	A	B	C	D	A	B	C	D	A	B	C	D	A	B	C	D	A
<1 year	0	18.8976	39.1076	41.9948	0	19.7492	49.8433	30.4075	0	18.8366	46.2604	34.903	0	32.2485	31.9527	35.7988	9.03614	38.253	37.0482	15.6627	1.99336	36.5449	38.8704	22.5914	0	18.732	34.5821	46.6859	0	18.8192	36.1624	45.0185	0	20.3762	37.6176	42.0063	0	20.9375	32.1875	46.875	2.30769	20.7692	31.5385	45.3846	0	21.3836	32.7044	45.9119	0
1~3 years	0	17.0404	37.2197	45.7399	0	15.3846	52.7473	31.8681	0	16.6667	45.3125	38.0208	0	35.8209	34.8259	29.3532	9.52381	33.8624	36.5079	20.1058	0	40.9938	36.0248	22.9814	0	17.7885	34.1346	48.0769	0	11.6129	40.6452	47.7419	0	15.1163	38.3721	46.5116	0	16.6667	35	48.3333	0	21.3333	39.3333	39.3333	0	14.7436	34.6154	50.641	0
3~5 years	0	14.8472	43.2314	41.9214	0	18.2292	46.3542	35.4167	0	16.2037	47.6852	36.1111	3.06122	25	45.9184	26.0204	3.20856	36.8984	43.8503	16.0428	6.77966	35.0282	43.5028	14.6893	3.07692	14.359	33.3333	49.2308	3.46821	15.0289	28.9017	52.6012	3.31492	12.7072	39.2265	44.7514	0	16.6667	36.1111	47.2222	3.65854	13.4146	31.7073	51.2195	0	21.8935	31.3609	46.7456	0
5~10 years	2.29446	17.9732	39.5793	40.153	1.27932	19.8294	44.9893	33.9019	1.16054	18.1818	43.5203	37.1373	5.08475	38.7712	25.2119	30.9322	15.1376	41.5138	32.7982	10.5505	5.39326	40.6742	27.6404	26.2921	3.81356	25.2119	29.2373	41.7373	9.88235	26.5882	29.8824	33.6471	5.26316	27.4123	30.0439	37.2807	0	20.2299	34.7126	45.0575	7.4813	24.4389	32.6683	35.4115	0	19.6262	35.7477	44.6262	1.16959
>10 years	0	15.7633	38.4403	45.7965	0.731261	17.0628	41.8038	40.4022	0	15.5594	41.0839	43.3566	3.27273	33.2121	29.0303	34.4848	8.59278	36.2391	31.2578	23.9103	4.53115	36.5639	29.4525	29.4525	4.46927	23.1533	32.5885	39.789	8.41121	25.7009	31.0414	34.8465	4.90566	23.9623	32.6415	38.4906	0	21.0427	34.9874	43.9698	4.38247	20.9827	32.5365	42.0983	0.386349	21.2492	34.0631	44.3014	0
																																					<1 year
																																					1~3 years
																																					3~5 years
																																					5~10 years
																																					>10 years
[truncated: 23 more columns]

## Sheet: frequency
	열 레이블
	aud_lud_cog				aud_lud_com				aud_lud_prp				aud_pit_cog				aud_pit_com				aud_pit_prp				tac_cyc_cog				tac_cyc_com				tac_cyc_prp				tac_siz_cog				tac_siz_com				tac_siz_prp				vis_lum_cog
	A	B	C	D	A	B	C	D	A	B	C	D	A	B	C	D	A	B	C	D	A	B	C	D	A	B	C	D	A	B	C	D	A	B	C	D	A	B	C	D	A	B	C	D	A	B	C	D	A
<1 hour	0	18.8148	38.3704	42.8148	0	17.7852	45.8054	36.4094	0	18.3544	44.6203	37.0253	0.977199	30.2932	31.759	36.9707	7.07071	33.3333	34.3434	25.2525	2.15827	31.1151	37.2302	29.4964	0	18.1219	34.1021	47.7759	0	16.5414	35.5263	47.9323	0	18.2143	36.0714	45.7143	0	20.2109	31.9859	47.8032	2.39044	18.7251	32.0717	46.8127	0	20.0364	31.8761	48.0874	0
1~5 hours	0.725514	16.445	39.0568	43.7727	0	18.6686	47.9016	33.4298	0.78125	16.5365	43.8802	38.8021	3.97351	35.7616	29.9338	30.3311	12.1786	40.1894	31.935	15.6969	6.73212	40.8135	29.7335	22.7209	2.41287	23.3244	32.4397	41.8231	11.8721	24.6575	29.9848	33.4855	4.12655	25.0344	33.8377	37.0014	0	16.9516	36.6097	46.4387	6.53188	17.7294	32.9705	42.7683	0	17.4367	35.6185	46.9449	0.735294
5~10 hours	0.583658	14.5914	38.9105	45.9144	1.2685	17.2304	40.9091	40.592	0	14.6613	41.3549	43.9838	3.84615	34.6154	28.5256	33.0128	10.274	37.5571	34.589	17.5799	4.70325	39.5297	28.7794	26.9877	5.8952	23.9083	32.4236	37.7729	7.92317	27.2509	32.0528	32.7731	6.02679	23.9955	34.2634	35.7143	0	22.361	36.2089	41.4302	5.11571	24.4823	33.3739	37.028	0.701754	23.0409	34.9708	41.2865	0
10~20 hours	0	16.4589	40.6484	42.8928	1.71429	16.2857	46	36	0	16.4062	43.2292	40.3646	0	31.9885	35.1585	32.853	7.03812	37.8299	35.1906	19.9413	0	36.3636	36.039	27.5974	5.14286	22	30	42.8571	7.81759	24.7557	30.9446	36.4821	5.50459	24.4648	28.1346	41.896	0	22.3188	30.1449	47.5362	3.7037	22.2222	30.5556	43.5185	0	22.1893	30.4734	47.3373	0
>20 hours	0	18.8841	37.7682	43.3476	0	20	40.4545	39.5455	0	19.6507	40.6114	39.738	5.85366	34.1463	27.3171	32.6829	6	35	28	31	5.91133	34.9754	27.5862	31.5271	2.80374	19.6262	31.7757	45.7944	3.10881	20.7254	28.4974	47.6684	2.88462	19.7115	31.7308	45.6731	0	20	36.6667	43.3333	0	21.466	35.6021	42.9319	0	20.3791	36.4929	43.128	0
																								<1 hour
																								1~5 hours
																								5~10 hours
																								10~20 hours
																								>20 hours
[truncated: 23 more columns]

## Sheet: accident
	열 레이블
	aud_lud_cog				aud_lud_com				aud_lud_prp				aud_pit_cog				aud_pit_com				aud_pit_prp				tac_cyc_cog				tac_cyc_com				tac_cyc_prp				tac_siz_cog				tac_siz_com				tac_siz_prp				vis_lum_cog
	A	B	C	D	A	B	C	D	A	B	C	D	A	B	C	D	A	B	C	D	A	B	C	D	A	B	C	D	A	B	C	D	A	B	C	D	A	B	C	D	A	B	C	D	A	B	C	D	A
No accident	0	16.0633	38.4935	45.4432	0.557103	17.5487	43.2219	38.6722	0	15.9211	41.8421	42.2368	3.03309	32.9504	29.2739	34.7426	10.0143	37.1006	31.3782	21.5069	4.13589	36.386	30.5761	28.902	3.05556	22.3148	32.963	41.6667	6.56592	23.5018	31.9958	37.9364	3.47826	22.8019	34.3961	39.3237	0	20.6052	34.1979	45.1969	4.1248	20.8355	33.5801	41.4595	0.298656	20.5575	34.1463	44.9975	0.247015
1 Times	1.34529	18.3857	39.4619	40.8072	1.52284	18.7817	45.4315	34.264	1.42857	17.8571	44.7619	35.9524	1.45985	36.4964	33.09	28.9538	9.06801	41.0579	38.7909	11.0831	4.59184	43.1122	36.2245	16.0714	5.98504	21.6958	29.6758	42.6434	8.26446	24.7934	31.405	35.5372	5.98504	23.4414	30.1746	40.399	0	19.2308	35.989	44.7802	6.89655	23.5632	29.8851	39.6552	0	19.382	35.1124	45.5056	0
2 Times	2.24719	15.7303	41.1985	40.824	0	18.894	51.6129	29.4931	0	17.8138	47.7733	34.413	5.15021	34.7639	33.4764	26.6094	5.40541	32.4324	40.5405	21.6216	5.76923	39.4231	33.1731	21.6346	2.5641	19.2308	32.906	45.2991	8.91089	21.7822	31.6832	37.6238	5.60748	21.4953	33.6449	39.2523	0	18.5841	38.0531	43.3628	2.83019	18.8679	31.1321	47.1698	0	22.6244	32.1267	45.2489	0
>3 Times	0	27.0833	45.8333	27.0833	0	15.7895	50	34.2105	0	25.4545	49.0909	25.4545	0	35.1351	40.5405	24.3243	0	29.4118	50	20.5882	0	23.8095	26.1905	50	0	21.0526	28.9474	50	0	21.0526	28.9474	50	0	24.2424	24.2424	51.5152	0	25.7143	28.5714	45.7143	0	20	30	50	0	26.3158	28.9474	44.7368	0
[truncated: 23 more columns]

## Sheet: stability
	열 레이블
	aud_lud_cog				aud_lud_com				aud_lud_prp				aud_pit_cog				aud_pit_com				aud_pit_prp				tac_cyc_cog				tac_cyc_com				tac_cyc_prp				tac_siz_cog				tac_siz_com				tac_siz_prp				vis_lum_cog
	A	B	C	D	A	B	C	D	A	B	C	D	A	B	C	D	A	B	C	D	A	B	C	D	A	B	C	D	A	B	C	D	A	B	C	D	A	B	C	D	A	B	C	D	A	B	C	D	A
Very stable	0	18.9415	40.9471	40.1114	1.75953	15.8358	42.8152	39.5894	0	17.6292	43.465	38.9058	5.37313	35.2239	30.1493	29.2537	10.2857	35.7143	28.8571	25.1429	7.59494	34.8101	31.0127	26.5823	5.38922	24.5509	33.5329	36.5269	9.40439	25.0784	31.0345	34.4828	5.6962	23.4177	34.8101	36.0759	0	22.6471	32.3529	45	0	21.4953	33.6449	44.8598	0	22.63	33.6391	43.7309	0
Generally stable	0	16	37.8095	46.1905	0.641026	19.2308	42.9487	37.1795	0	16.2216	41.9387	41.8398	1.82371	32.2188	30.9017	35.0557	10.2236	36.5282	33.2268	20.0213	3.86681	36.1976	32.4382	27.4973	2.47934	22.1074	31.8182	43.595	5.23691	24.1895	32.0449	38.5287	3.28228	23.523	32.2757	40.919	0	20.6402	33.4437	45.9161	3.72208	21.8362	33.0025	41.4392	0	21.0646	33.1823	45.7531	0
Slightly stable	1.36054	17.4603	39.0023	42.1769	0	16.7109	45.0928	38.1963	0	17.2662	42.9257	39.8082	3	36.5	30.25	30.25	8.4507	39.7183	37.7465	14.0845	3.19149	41.7553	32.4468	22.6064	6.16967	24.6787	31.1054	38.0463	5.37313	28.9552	30.4478	35.2239	6.34921	26.1905	32.0106	35.4497	0	22.2513	34.8168	42.9319	0	22.6744	34.0116	43.314	0	22.1024	35.31	42.5876	0
Moderate	0	13.5922	39.8058	46.6019	0	15.8172	44.2882	39.8946	0	14.1176	43.0252	42.8571	1.08303	36.2816	32.13	30.5054	4.35572	36.6606	33.9383	25.0454	2.29008	35.8779	30.3435	31.4885	5.59701	21.6418	30.4104	42.3507	11.1111	19.0741	30	39.8148	6.71642	21.4552	33.0224	38.806	0	15.8192	37.4765	46.7043	7.25806	16.9355	33.4677	42.3387	0	17.2481	33.9147	48.8372	0.946372
Slightly aggressive	0.941915	17.2684	38.4615	43.3281	1.1257	19.137	45.9662	33.7711	1.01695	17.2881	43.5593	38.1356	5.66038	30.1887	28.3019	35.8491	12.9666	37.3281	33.5953	16.11	6.22407	38.5892	30.7054	24.4813	0	18.6933	35.9347	45.3721	4.97925	21.7842	35.0622	38.1743	0	20.2677	37.4761	42.2562	0	21.2851	36.5462	42.1687	7.74194	22.5806	32.4731	37.2043	1.25786	20.9644	36.0587	41.7191	0
Generally aggressive	0	27.1186	44.0678	28.8136	0	21.2766	55.3191	23.4043	0	26.6667	46.6667	26.6667	0	35.2941	21.5686	43.1373	13.0435	47.8261	30.4348	8.69565	0	50	31.8182	18.1818	0	20	30.9091	49.0909	0	31.8182	31.8182	36.3636	0	21.5686	27.451	50.9804	0	22	24	54	12.2449	20.4082	12.2449	55.102	0	22	24	54	0
[truncated: 23 more columns]

## Sheet: speed
	열 레이블
	aud_lud_cog				aud_lud_com				aud_lud_prp				aud_pit_cog				aud_pit_com				aud_pit_prp				tac_cyc_cog				tac_cyc_com				tac_cyc_prp				tac_siz_cog				tac_siz_com				tac_siz_prp				vis_lum_cog
	A	B	C	D	A	B	C	D	A	B	C	D	A	B	C	D	A	B	C	D	A	B	C	D	A	B	C	D	A	B	C	D	A	B	C	D	A	B	C	D	A	B	C	D	A	B	C	D	A
very slow	0	16.6667	33.3333	50	0	16.6667	33.3333	50	0	16.6667	33.3333	50	0	33.3333	16.6667	50	0	33.3333	16.6667	50	0	33.3333	16.6667	50	0	19.3548	38.7097	41.9355	0	19.3548	38.7097	41.9355	0	19.3548	38.7097	41.9355	0	50	33.3333	16.6667	0	50	33.3333	16.6667	0	50	33.3333	16.6667	0
generally slow	0	14.5161	37.0968	48.3871	0	17.3611	40.9722	41.6667	0	15.4362	41.2752	43.2886	0	30.3136	29.6167	40.0697	6.38298	32.9787	31.2057	29.4326	2.17391	29.3478	32.971	35.5072	6.36042	21.2014	29.3286	43.1095	6.94981	21.6216	31.2741	40.1544	6.74157	22.0974	31.8352	39.3258	0	23.3813	29.1367	47.482	0	22.1774	28.629	49.1935	0	23.2143	29.2857	47.5	0
slightly slow	1.83486	18.6544	43.1193	36.3914	0	18.797	52.6316	28.5714	0	18.0328	48.5246	33.4426	1.99336	37.5415	34.5515	25.9136	8.42105	36.1404	39.2982	16.1404	2.23881	41.0448	36.9403	19.7761	0	20.0704	35.2113	44.7183	0	19.8381	38.8664	41.2955	0	22.1344	39.1304	38.7352	0	15.2416	33.829	50.9294	2.41935	19.7581	33.4677	44.3548	0	14.9606	33.4646	51.5748	0
moderate	0	16.622	40.2145	43.1635	0.575816	16.2188	44.4338	38.7716	0	16.2835	43.1034	40.613	3.49176	33.2687	35.3055	27.934	7.27273	35.8586	37.2727	19.596	5.04202	36.2395	36.1345	22.584	6.85714	23.1429	30.7619	39.2381	8.87012	24.604	29.1447	37.3812	8.38323	23.4531	30.1397	38.024	0	18.2182	34.7347	47.047	1.91898	19.5096	32.9424	45.629	0	18.9386	33.6108	47.4506	0
slight fast	0.547945	15.8904	37.8082	45.7534	1.2487	19.4589	42.768	36.5245	0.567644	16.4617	42.2895	40.6812	3.10881	33.9896	26.0104	36.8912	12.8755	38.412	28.97	19.7425	4.58015	38.6041	26.6085	30.2072	0.642398	21.5203	33.4047	44.4325	6.43623	22.8844	32.7771	37.9023	0.650054	22.4269	34.7779	42.1452	0	21.8103	36.8593	41.3304	6.67491	21.1372	36.4648	35.7231	0.671892	21.8365	36.2822	41.2094	0.549451
generally fast	0	18.4116	36.4621	45.1264	0	17.619	46.1905	36.1905	0	17.1756	40.8397	41.9847	5.06329	32.9114	23.6287	38.3966	10.6667	45.3333	32.8889	11.1111	5.35714	43.75	26.3393	24.5536	0	21.9124	35.4582	42.6295	9.04523	28.6432	31.6583	30.6533	0	23.5537	38.843	37.6033	0	21.1538	33.6538	45.1923	14.8515	22.7723	21.7822	40.5941	0	22	33.5	44.5	0
very slow	0	18.4116	36.4621	45.1264	0	17.619	46.1905	36.1905	0	17.1756	40.8397	41.9847	5.06329	32.9114	23.6287	38.3966	10.6667	45.3333	32.8889	11.1111	5.35714	43.75	26.3393	24.5536	0	21.9124	35.4582	42.6295	9.04523	28.6432	31.6583	30.6533	0	23.5537	38.843	37.6033	0	21.1538	33.6538	45.1923	14.8515	22.7723	21.7822	40.5941	0	22	33.5	44.5	0
generally slow	0	14.5161	37.0968	48.3871	0	17.3611	40.9722	41.6667	0	15.4362	41.2752	43.2886	0	30.3136	29.6167	40.0697	6.38298	32.9787	31.2057	29.4326	2.17391	29.3478	32.971	35.5072	6.36042	21.2014	29.3286	43.1095	6.94981	21.6216	31.2741	40.1544	6.74157	22.0974	31.8352	39.3258	0	23.3813	29.1367	47.482	0	22.1774	28.629	49.1935	0	23.2143	29.2857	47.5	0
slightly slow	0	16.6667	33.3333	50	0	16.6667	33.3333	50	0	16.6667	33.3333	50	0	33.3333	16.6667	50	0	33.3333	16.6667	50	0	33.3333	16.6667	50	0	19.3548	38.7097	41.9355	0	19.3548	38.7097	41.9355	0	19.3548	38.7097	41.9355	0	50	33.3333	16.6667	0	50	33.3333	16.6667	0	50	33.3333	16.6667	0
moderate	0	16.622	40.2145	43.1635	0.575816	16.2188	44.4338	38.7716	0	16.2835	43.1034	40.613	3.49176	33.2687	35.3055	27.934	7.27273	35.8586	37.2727	19.596	5.04202	36.2395	36.1345	22.584	6.85714	23.1429	30.7619	39.2381	8.87012	24.604	29.1447	37.3812	8.38323	23.4531	30.1397	38.024	0	18.2182	34.7347	47.047	1.91898	19.5096	32.9424	45.629	0	18.9386	33.6108	47.4506	0
slight fast	0.547945	15.8904	37.8082	45.7534	1.2487	19.4589	42.768	36.5245	0.567644	16.4617	42.2895	40.6812	3.10881	33.9896	26.0104	36.8912	12.8755	38.412	28.97	19.7425	4.58015	38.6041	26.6085	30.2072	0.642398	21.5203	33.4047	44.4325	6.43623	22.8844	32.7771	37.9023	0.650054	22.4269	34.7779	42.1452	0	21.8103	36.8593	41.3304	6.67491	21.1372	36.4648	35.7231	0.671892	21.8365	36.2822	41.2094	0.549451
generally fast	1.83486	18.6544	43.1193	36.3914	0	18.797	52.6316	28.5714	0	18.0328	48.5246	33.4426	1.99336	37.5415	34.5515	25.9136	8.42105	36.1404	39.2982	16.1404	2.23881	41.0448	36.9403	19.7761	0	20.0704	35.2113	44.7183	0	19.8381	38.8664	41.2955	0	22.1344	39.1304	38.7352	0	15.2416	33.829	50.9294	2.41935	19.7581	33.4677	44.3548	0	14.9606	33.4646	51.5748	0
[truncated: 23 more columns]
